# Supplementary material for: Antimicrobial Evaluation of Various Honey Types against Carbapenemase-Producing Gram-Negative Clinical Isolates
Source: MDPI journal article supplement (doi:10.3390/antibiotics11030422), 2022-03-21
Supplement: s1 [file s1]

## Supplementary Materials

**Table S1.** Antibacterial activity (zone of inhibition in mm) of various concentrations of the different honeys against *Enterobacter cloacae* subsp *dissolvens* assessed by the well diffusion method.

| Honey type                          | Inhibition zone (in mm) |                      |                      |                  |                 |
|-------------------------------------|-------------------------|----------------------|----------------------|------------------|-----------------|
|                                     | 75%                     | 50%                  | 25%                  | 12.5%            | 6.25%           |
| <i>Cotton</i>                       | 16.15±3.55              | 13.95±2.51           | 11.7±1.48            | 10.03±1.5 (n=2)  | 9.4 (n=1)       |
| <i>Arbutus</i>                      | 18.46±4.19              | 15.26±2.41           | 12.28±2.11           | 11.00±1.62 (n=3) | 9.2 (n=1)       |
| <i>Chestnut</i>                     | 15.44±1.63              | 13.32±1.80           | 11.48±1.19           | 9.25±0.21 (n=2)  | 0               |
| <i>Thyme</i>                        | 15.19±1.09              | 12.14±1.76           | 7.80±4.45            | 7.7 (n=1)        | 0               |
| <i>Orange</i>                       | 16.65±0.36              | 12.35±0.76           | 10.01±0.25           | 0                | 0               |
| <i>Oregano</i>                      | 14.38±0.61              | 13.15±1.60           | 11.53±1.70           | 9.8±1.27 (n=2)   | 0               |
| <i>Fir</i>                          | 15.79±1.28              | 14.17±1.00           | 12.44±1.24           | 10.46±1.67 (n=5) | 9.05±0.15 (n=2) |
| <i>Sunflower</i>                    | 13.67±0.39              | 11.90±0.31           | 8.75±3.94            | 0                | 0               |
| <i>Heath</i>                        | 15.88±2.84              | 13.12±2.44           | 10.16±2.72           | 9.7±2.12 (n=2)   | 8.7 (n=1)       |
| <i>Manuka</i>                       | 21.3                    | 15.2                 | 11.3                 | 0                | 0               |
| <i>Artificial honey</i>             | 6.2                     | 0                    | 0                    | 0                | 0               |
| <i>Significance (One way ANOVA)</i> | F=6.321064<br>P<0.0001  | F=2.571789<br>P<0.05 | F=3.343586<br>P<0.05 | -                | -               |

**Table S2.** Geometrical means of the antibacterial activity of the different honeys against *Enterobacter cloacae* subsp *dissolvens* assessed by the MIC method as crude sample, with the addition of catalase and protease.

| Honey type              | MIC <sub>95</sub> values (% v/v) |                         |                   |
|-------------------------|----------------------------------|-------------------------|-------------------|
|                         | Crude samples                    | Catalase addition       | Protease addition |
| <i>Cotton</i>           | 5.26                             | 8.84                    | 7.43              |
| <i>Arbutus</i>          | 4.74                             | 6.25                    | 6.25              |
| <i>Chestnut</i>         | 4.74                             | 8.25                    | 8.25              |
| <i>Thyme</i>            | 6.25                             | 9.47                    | 10.88             |
| <i>Orange</i>           | 12.5                             | 21.02                   | 14.87             |
| <i>Oregano</i>          | 7.43                             | 8.84                    | 8.84              |
| <i>Fir</i>              | 5.13                             | 6.90                    | 6.90              |
| <i>sunflower</i>        | 9.92                             | 19.84                   | 15.75             |
| <i>Heath</i>            | 6.25                             | 12.16                   | 10.88             |
| <i>Manuka</i>           | 6.25                             | 25                      | 12.50             |
| <i>Artificial honey</i> | -                                | -                       | -                 |
|                         | -                                | F=12.035046<br>P<0.0001 | -                 |

**Table S3.** Antibacterial activity (zone of inhibition in mm) of various concentrations of the different honeys against *P. aeruginosa* assessed by the well diffusion method.

| Honey type      | Inhibition zone (in mm) |            |                    |                    |       |
|-----------------|-------------------------|------------|--------------------|--------------------|-------|
|                 | 75%                     | 50%        | 25%                | 12.5%              | 6.25% |
| <i>Cotton</i>   | 16.58±1.21              | 13.1±1.72  | 8.28±4.86<br>(n=4) | 0                  | 0     |
| <i>Arbutus</i>  | 16.44±3.93              | 12.88±2.64 | 11.16±2.05         | 10.13±0.4<br>(n=3) | 0     |
| <i>Chestnut</i> | 15.04±3.09              | 13.46±1.59 | 10.64±2.06         | 9.8±0.42<br>(n=2)  | 0     |
| <i>Thyme</i>    | 15.72±3.75              | 13.40±1.75 | 11.92±1.93         | 13.4 (n=1)         | 0     |
| <i>Orange</i>   | 13.38±0.52              | 11.85±0.43 | 5.3±5.3 (n=3)      | 0                  | 0     |

|                                     |                          |            |                          |                    |   |
|-------------------------------------|--------------------------|------------|--------------------------|--------------------|---|
| <i>Oregano</i>                      | 13.05±0.98               | 11.33±1.29 | 2.8±4.8 (n=2)            | 0                  | 0 |
| <i>Fir</i>                          | 14.66±2.21               | 13.01±1.27 | 8.37±5.88<br>(n=5)       | 11.8 (n=1)         | 0 |
| <i>sunflower</i>                    | 13.23±0.73               | 11.73±0.74 | 3.23±3.96<br>((n=3)      | 0                  | 0 |
| <i>Heath</i>                        | 15.30±2.56               | 12.92±2.42 | 11.66±1.98               | 10.55±1.2<br>(n=2) | 0 |
| <i>Manuka</i>                       | 18.2                     | 14.4       | 14.4                     | 0                  | 0 |
| <i>Artificial honey</i>             | 6.2                      | 0          | 0                        | 0                  | 0 |
| <i>Significance (One way ANOVA)</i> | F=2.590381<br>P=0.017902 | -          | F=4.058618<br>P=0.000805 | -                  | - |

**Table S4.** Geometrical means of the antibacterial activity of the different honeys against *P. aeruginosa* assessed by the MIC method as crude sample, with the addition of catalase and protease.

| Honey type              | MIC <sub>95</sub> values (% v/v) |                   |                   |
|-------------------------|----------------------------------|-------------------|-------------------|
|                         | Crude samples                    | Catalase addition | Protease addition |
| <b>Cotton</b>           | 6.25                             | 7.43              | 6.25              |
| <b>Arbutus</b>          | 7.18                             | 10.88             | 9.47              |
| <b>Chestnut</b>         | 6.25                             | 12.5              | 9.47              |
| <b>Thyme</b>            | 6.25                             | 8.25              | 8.84              |
| <b>Orange</b>           | 8.84                             | 42.04             | 12.5              |
| <b>Oregano</b>          | 8.84                             | 10.51             | 9.92              |
| <b>Fir</b>              | 6.25                             | 7.62              | 9.29              |
| <b>Sunflower</b>        | 9.92                             | 9.92              | 9.92              |
| <b>Heath</b>            | 7.18                             | 7.18              | 9.47              |
| <b>Manuka</b>           | 6.25                             | 6.25              | 6.25              |
| <b>Artificial honey</b> | -                                | -                 | -                 |
|                         |                                  | F=16.369898       |                   |
|                         |                                  | P<0.001           |                   |

**Table S5.** Antibacterial activity (zone of inhibition in mm) of various concentrations of the different honeys against *Klebsiella pneumoniae* subsp *pneumoniae* (1) assessed by the well diffusion metho.

| Honey type                          | Inhibition zone (in mm) |            |            |                  |       |
|-------------------------------------|-------------------------|------------|------------|------------------|-------|
|                                     | 75%                     | 50%        | 25%        | 12.5%            | 6.25% |
| <i>Cotton</i>                       | 15.15±2.88              | 12.58±0.70 | 10.63±1.03 | 0                | 0     |
| <i>Arbutus</i>                      | 14.96±3.22              | 12.90±2.82 | 9.14±5.47  | 10.60±1.56 (n=2) | 0     |
| <i>Chestnut</i>                     | 14.44±2.78              | 13.28±2.52 | 11.66±1.82 | 10.75±1.91 (n=2) | 0     |
| <i>Thyme</i>                        | 13.88±0.76              | 12.46±0.54 | 10.24±1.33 | 9.4 (n=1)        | 0     |
| <i>Orange</i>                       | 13.63±0.90              | 11.80±1.22 | 4.98±4.98  | 0                | 0     |
| <i>Oregano</i>                      | 14.3±0.96               | 12.30±0.55 | 8.18±4.78  | 9.00±0.99 (n=2)  | 0     |
| <i>Fir</i>                          | 15.81±1.88              | 13.99±2.22 | 10.00±1.98 | 10.04±0.42 (n=2) | 0     |
| <i>Sunflower</i>                    | 13.90±0.93              | 12.43±1.70 | 9.67±1.08  | 0                | 0     |
| <i>Heath</i>                        | 14.32±2.21              | 12.30±2.07 | 8.74±5.1   | 9.4 (n=1)        | 0     |
| <i>Manuka</i>                       | 17.40                   | 13.10      | 9.1        | 0                | 0     |
| <i>Artificial honey</i>             | 6.4                     | 0          | 0          | 0                | 0     |
| <i>Significance (One way ANOVA)</i> | -                       | -          | -          | -                | -     |

**Table S6.** Geometrical means of the antibacterial activity of the different honeys against *Klebsiella pneumoniae* subsp *pneumoniae* (1) assessed by the MIC method as crude sample, with the addition of catalase and protease.

| Honey type | MIC <sub>95</sub> values (% v/v) |                   |                   |
|------------|----------------------------------|-------------------|-------------------|
|            | Crude samples                    | Catalase addition | Protease addition |

|                         |      |            |       |
|-------------------------|------|------------|-------|
| <b>Cotton</b>           | 7.43 | 12.5       | 10.51 |
| <b>Arbutus</b>          | 7.18 | 10.88      | 12.5  |
| <b>Chestnut</b>         | 8.25 | 21.76      | 10.51 |
| <b>Thyme</b>            | 7.18 | 9.47       | 9.47  |
| <b>Orange</b>           | 8.84 | 14.86      | 10.51 |
| <b>Oregano</b>          | 6.25 | 8.84       | 8.84  |
| <b>Fir</b>              | 5.13 | 6.90       | 6.90  |
| <b>Sunflower</b>        | 9.92 | 19.84      | 12.5  |
| <b>Heath</b>            | 8.25 | 10.88      | 14.36 |
| <b>Manuka</b>           | 6.25 | 25         | 12.5  |
| <b>Artificial honey</b> | -    | F=4.380606 |       |
|                         |      | P=0.000448 |       |

**Table S7.** Antibacterial activity (zone of inhibition in mm) of various concentrations of the different honeys against *Klebsiella pneumoniae* subsp *pneumoniae* (2) assessed by the well diffusion method.

| <i>Honey type</i>                   | <b>Inhibition zone (in mm)</b> |                         |                       |                     |              |
|-------------------------------------|--------------------------------|-------------------------|-----------------------|---------------------|--------------|
|                                     | <b>75%</b>                     | <b>50%</b>              | <b>25%</b>            | <b>12.5%</b>        | <b>6.25%</b> |
| <i>Cotton</i>                       | 15.48±2.44                     | 13.73±1.45              | 11.58±0.39            | 9.05±0.91<br>(n=2)  | 0            |
| <i>Arbutus</i>                      | 15.44 ±1.84                    | 13.96±1.13              | 12.12±1.10            | 10.03±0.12<br>(n=3) | 0            |
| <i>Chestnut</i>                     | 14.64±1.64                     | 13.46±1.80              | 12.13±1.87            | 9.77±0.81<br>(n=3)  | 9.1<br>(n=1) |
| <i>Thyme</i>                        | 13.96±0.23                     | 12.26±0.56              | 10.46±0.27            | 8.60±0.71<br>(n=2)  | 0            |
| <i>Orange</i>                       | 13.83±0.33                     | 12.30±0.24              | 10.75±0.68            | 0                   | 0            |
| <i>Oregano</i>                      | 14.10±0.66                     | 11.83±1.04              | 9.53±0.60             | 8.10±0.328<br>(n=2) | 0            |
| <i>Fir</i>                          | 15.50±1.17                     | 13.12±1.21              | 10.39±1.16            | 9.27±0.06<br>(n=3)  | 7.4<br>(n=1) |
| <i>Sunflower</i>                    | 14.43±0.59                     | 11.60±0.91              | 8.93±0.93             | 0                   | 0            |
| <i>Heath</i>                        | 15.08±1.75                     | 12.06±1.31              | 9.40±1.91             | 8.7 (n=1)           | 0            |
| <i>Manuka</i>                       | 16.5                           | 12.80                   | 9.3                   | 8.4                 | 0            |
| <i>Artificial honey</i>             | 6.4                            | 0                       | 0                     | 0                   | 0            |
| <i>Significance (One way ANOVA)</i> | F=2.157406<br>P=0.045356       | F=2.919213<br>P=0.00887 | F=5.205593<br>P<0.001 | -                   | -            |

**Table S8.** Geometrical means of the antibacterial activity of the different honeys against *Klebsiella pneumoniae* subsp *pneumoniae* (2) assessed by the MIC method as crude sample, with the addition of catalase and protease.

| <b>Honey type</b> | <b>MIC<sub>95</sub> values (% v/v)</b> |                          |                          |
|-------------------|----------------------------------------|--------------------------|--------------------------|
|                   | <b>Crude samples</b>                   | <b>Catalase addition</b> | <b>Protease addition</b> |
| <b>Cotton</b>     | 7.43                                   | 12.50                    | 7.43                     |
| <b>Arbutus</b>    | 6.25                                   | 10.51                    | 8.25                     |
| <b>Chestnut</b>   | 7.18                                   | 16.49                    | 10.88                    |
| <b>Thyme</b>      | 9.47                                   | 10.88                    | 12.50                    |
| <b>Orange</b>     | 8.84                                   | 35.35                    | 12.50                    |
| <b>Oregano</b>    | 7.43                                   | 12.50                    | 6.90                     |
| <b>Fir</b>        | 5.13                                   | 7.62                     | 12.50                    |
| <b>Sunflower</b>  | 9.92                                   | 19.84                    | 12.50                    |
| <b>Heath</b>      | 8.25                                   | 10.88                    | 10.51                    |

|                         |      |            |       |
|-------------------------|------|------------|-------|
| <b>Manuka</b>           | 6.25 | 25.00      | 12.50 |
| <b>Artificial honey</b> | -    | -          | -     |
|                         |      | F=8.053138 |       |
|                         | -    | P<0.0001   | -     |

**Table S9.** Geometrical means of the MICs values of the honeys' extracts by different solvents against *P. aeruginosa*.

| Honey type               | Solvent               |                       |                       |                         |
|--------------------------|-----------------------|-----------------------|-----------------------|-------------------------|
|                          | n-hexane              | diethylether          | chloroform            | ethylacetate            |
| Cotton                   | 11.18                 | 2.5                   | 10.62                 | 3.15                    |
| Arbutus                  | 5                     | 1.65                  | 9.36                  | 3.59                    |
| Chestnut                 | 9.21                  | 4.51                  | 8.80                  | 3.97                    |
| Thyme                    | 8.59                  | 3.37                  | 7.09                  | 5                       |
| Orange                   | 2.5                   | 9.84                  | 8.55                  | 10                      |
| Oregano                  | 8.41                  | 2.1                   | 6.12                  | 4.45                    |
| Fir                      | 3.71                  | 1.38                  | 2.5                   | 3.36                    |
| Sunflower                | 9.09                  | 3.96                  | 0                     | 4.54                    |
| Heath                    | 9.31                  | 3.74                  | 7.07                  | 2.66                    |
| STATISTICAL SIGNIFICANCE | F=7.501293<br>P<0.001 | F=5.758054<br>P<0.001 | F=6.828794<br>P<0.001 | F=2.92929<br>P=0.011617 |

**Table S10.** Geometrical means of the MICs values of the honeys' extracts by different solvents against *K. pneumoniae* subsp *pneumoniae* (1).

| Honey type               | Solvent                  |                  |                |                  |
|--------------------------|--------------------------|------------------|----------------|------------------|
|                          | n-hexane                 | diethylether     | chloroform     | ethylacetate     |
| Cotton                   | 8.25                     | 0.99             | 0.88           | 2.5              |
| Arbutus                  | 5.42                     | 0.79             | 1.65           | 1.25             |
| Chestnut                 | 2.5                      | 1.05             | 1.49           | 1.25             |
| Thyme                    | 2.22                     | 1.89             | 3.30           | 3.30             |
| Orange                   | 6.69                     | 1.25             | 2.5            | 2.5              |
| Oregano                  | 1.77                     | 0.74             | 1.50           | 2.10             |
| Fir                      | 1.91                     | 0.67             | 1.03           | 2.26             |
| Sunflower                | 3.54                     | 1.57             | 3.15           | 1.98             |
| Heath                    | 2.66                     | 0.50             | 1.49           | 3.15             |
| STATISTICAL SIGNIFICANCE | F=3.317438<br>P=0.005681 | NS<br>P=0.461486 | NS<br>P=0.0698 | NS<br>P=0.113214 |

**Table S11.** Geometrical means of the MICs of the honeys' extracts by different solvents against *E. cloacae* subsp *dissolvens*.

| Honey type | Solvent  |              |            |              |
|------------|----------|--------------|------------|--------------|
|            | n-hexane | diethylether | chloroform | ethylacetate |
| Cotton     | 3.97     | 0.99         | 6.30       | 2.5          |
| Arbutus    | 1.09     | 1.09         | 2.5        | 1.25         |
| Chestnut   | 1.77     | 0.44         | 1.77       | 1.25         |
| Thyme      | 2.18     | 0.88         | 4.72       | 1.25         |
| Orange     | 5.15     | 1.25         | 5.72       | 2.97         |
| Oregano    | 4.22     | 0.63         | 2.5        | 3.54         |
| Fir        | 1.13     | 0.62         | 1.99       | 1.52         |
| Sunflower  | 2.5      | 0.63         | 0.99       | 1.57         |

|                           |                      |                  |                  |                       |
|---------------------------|----------------------|------------------|------------------|-----------------------|
| Heath                     | 4.65                 | 0.95             | 1.09             | 3.67                  |
| STATISTICAL SIG-NIFICANCE | F=4.75301<br>P<0.001 | NS<br>P=0.475181 | NS<br>P=0.193689 | F=4.345257<br>P<0.001 |

**Table S12.** Geometrical means of the MICs values of the honeys' extracts by different solvents against *K. pneumoniae* subsp *pneumoniae* (2).

| Honey type                | Solvent                  |                       |                      |                  |
|---------------------------|--------------------------|-----------------------|----------------------|------------------|
|                           | n-hexane                 | diethylether          | chloroform           | ethylacetate     |
| Cotton                    | 1.25                     | 0.25                  | 3.54                 | 1.25             |
| Arbutus                   | 1.89                     | 0.63                  | 1.89                 | 1.44             |
| Chestnut                  | 1.25                     | 0.63                  | 1.25                 | 1.25             |
| Thyme                     | 0.99                     | 0.35                  | 3.27                 | 2.81             |
| Orange                    | 3.15                     | 0.31                  | 8.27                 | 2.5              |
| Oregano                   | 2.97                     | 0.26                  | 7.28                 | 2.10             |
| Fir                       | 1.38                     | 0.46                  | 2.5                  | 2.5              |
| Sunflower                 | 1.25                     | 0.79                  | 7.77                 | 3.15             |
| Heath                     | 1.65                     | 2.18                  | 4.55                 | 2.87             |
| STATISTICAL SIG-NIFICANCE | F=3.086028<br>P=0.012178 | F=8.249112<br>P<0.001 | F=5.99412<br>P<0.001 | NS<br>P=0.068691 |
